# Supplementary material for: CHO-S Antibody Titers >1 Gram/Liter Using Flow Electroporation-Mediated Transient Gene Expression followed by Rapid Migration to High-Yield Stable Cell Lines
Source: PubMed Central journal article supplement — J Biomol Screen. 2015 Apr;20(4):545–51. doi: 10.1177/1087057114563494 (PMC4512034; doi:10.1177/1087057114563494), 2015-04
Supplement: DS_10.1177_1087057114563494.pdf [file DS_10.1177_1087057114563494.pdf]

## CHO Cell Transfection Efficiency

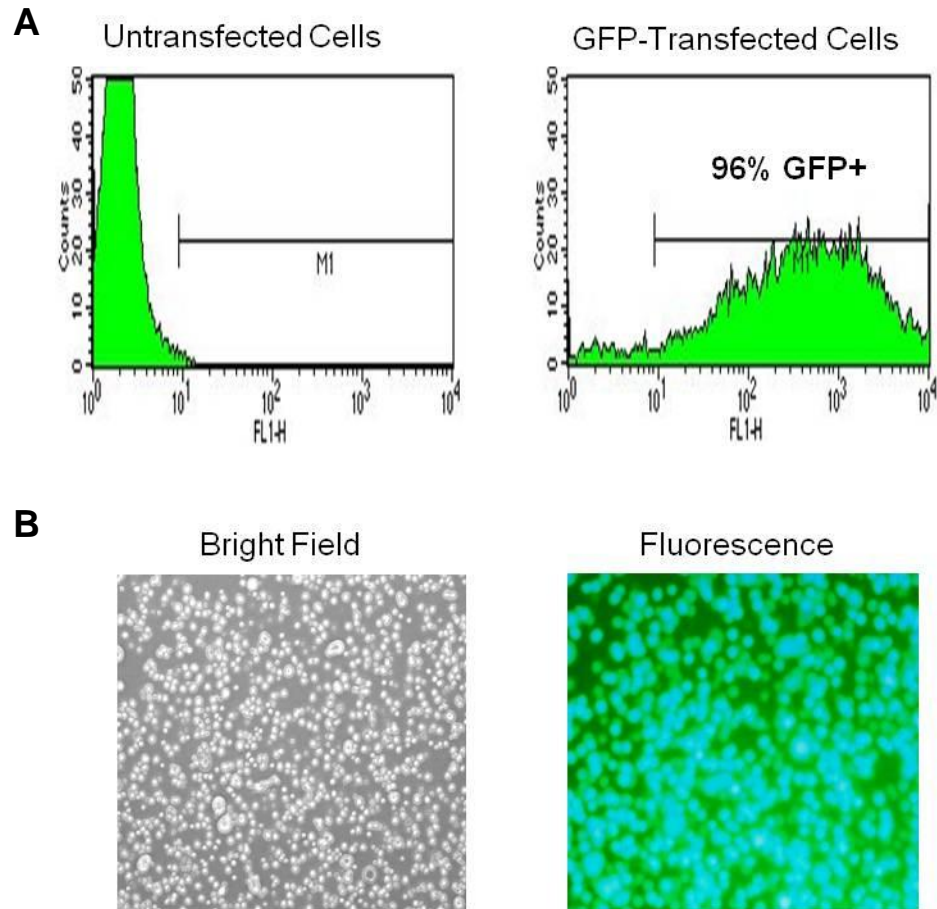

**Supplemental Figure S1.** High transfection efficiency and cell viability following CHO cell electroporation . CHO-S cells were electroporated with a plasmid (2  $\mu$ g DNA/ $1 \times 10^6$  cells) encoding GFP. GFP expression and cell viability were measured 24 hours post electroporation via flow cytometry and microscopy. **(A)** FACS analysis of transfected and untransfected CHO cells **(B)** Bright field and fluorescence microscopy of GFP-transfected cells.

## Reproducibility and Scalability of Flow Electroporation

| Date               | Electroporation Scale | Titer (mg/L) |
|--------------------|-----------------------|--------------|
| March 20           | Large                 | 396          |
| March 20           | Small                 | 351          |
| April 24           | Large                 | 328          |
| April 24           | Small                 | 337          |
| April 24           | Small                 | 464          |
| April 24           | Small                 | 334          |
| June 12            | Large                 | 453          |
| June 12            | Small                 | 459          |
| July 3             | Small                 | 517          |
| July 3             | Small                 | 455          |
| <b>Total</b>       | Avg±stdv              | 409 ± 68     |
| <b>Small-Scale</b> | Avg±stdv              | 417 ± 74     |
| <b>Large-Scale</b> | Avg±stdv              | 392 ± 63     |

**Supplemental Table 1.** Consistent and reproducible production of antibodies using small- and large-scale CHO cell electroporation. Ten CHO-S cell electroporations were performed on the indicated dates with an antibody expression plasmid (1 µg DNA/1x10<sup>6</sup> cells) via seven small-scale or three large-scale electroporation runs. All cells were cultured using unsupplemented CD CHO medium. Secreted antibody titers were measured via ELISA on day 14 post electroporation.

## Sodium Butyrate and Temperature Shift Maximize Productivity

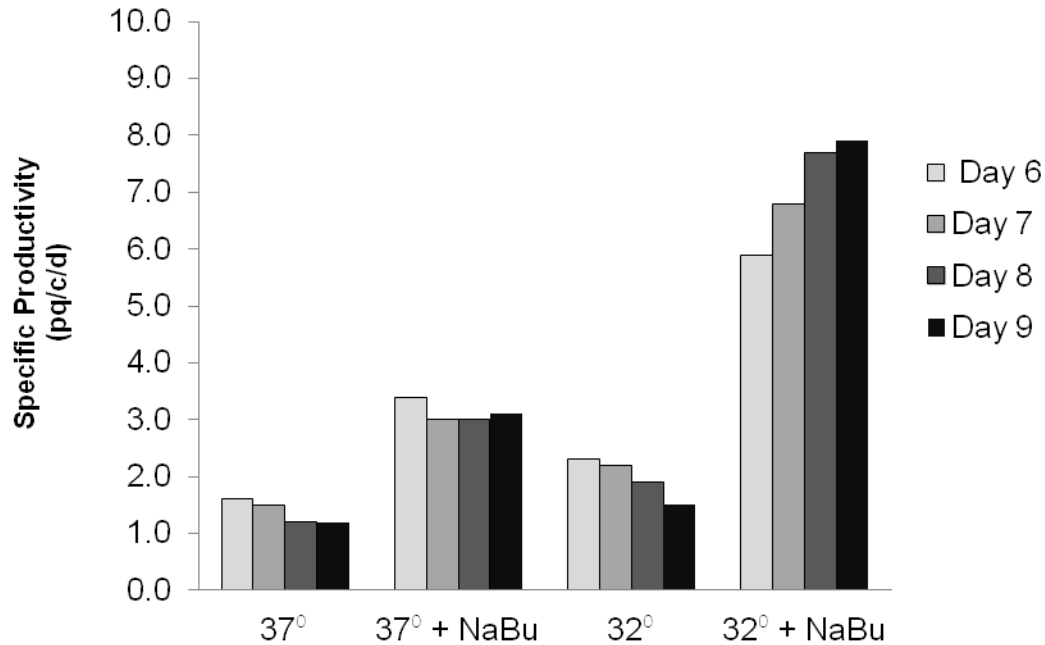

**Supplemental Figure S2.** Temperature shift and addition of sodium butyrate increase antibody production post electroporation. CHO-S cells were electroporated with an antibody expression plasmid (2  $\mu\text{g}$  DNA/ $1 \times 10^6$  cells). Post electroporation cells were cultured in unsupplemented CD CHO medium. 24 hours post electroporation the temperature was shifted to 32°C for half of the cultures and 1mM sodium butyrate was added to half of the cultures. Antibody titers were measured on days 6, 7, 8, and 9 post electroporation via ELISA and specific productivity calculated.

## Rapid Generation of High-Yield Stable Clones

| Number of Clones in Primary Screen                        | 479              |
|-----------------------------------------------------------|------------------|
| Number of Clones Chosen for Analysis in Expanded Cultures | 23 (Top 5%)      |
| IgG Titer for Top 5%                                      | Number of Clones |
| < 1.0 g/L                                                 | 17               |
| 1.0 – 1.9 g/L                                             | 4                |
| 2.0 – 2.9 g/L                                             | 1                |
| ≥ 3 g/L                                                   | 1                |

**Supplemental Table 2.** CHO-S cell were electroporated with a humanized mAb DNA plasmid and cultured post electroporation in G418 selection medium. Limiting dilution cloning was performed in 25, 96-well plates at 0.3 cells per well. Clones were screened for antibody production approximately one week following limiting dilution cloning. The top 23 clones were further expanded and IgG titer determined via ELISA. The titers of the top 23 performers on day 21 following inoculation of the scaled up cultures are reported.
